# Supplementary material for: Synthesis and biological evaluation of novel pyrano[3,2-c]carbazole derivatives as anti-tumor agents inducing apoptosis via tubulin polymerization inhibition
Source: Royal Society of Chemistry journal article supplement (doi:10.1039/c4ob02015d), 2014-11-19

Supporting Information for

**Synthesis and Biological Evaluation of Novel Pyrano[3,2-*c*]carbazole Derivatives as Anti-tumor Agents inducing apoptosis via tubulin polymerization inhibition**

**Pannala Padmaja,\*<sup>a</sup> Garikapati Koteswara Rao,<sup>b</sup> Adisherla Indrasena,<sup>a</sup> Basireddy V. Subba Reddy,<sup>b</sup> Nibedita Patel,<sup>b</sup> Anver Basha Shaik,<sup>b</sup> Narayana Reddy,<sup>c</sup> Pramod K. Dubey,<sup>a</sup> Manika Pal Bhadra\*<sup>b</sup>**

<sup>a</sup>Department of Chemistry, JNTUH college of Engineering, Kukatpally, Hyderabad (T.S), India-500 085. E-mail: [padduiict@gmail.com](mailto:padduiict@gmail.com)

<sup>b</sup>CSIR – Indian Institute of Chemical Technology, Hyderabad–500 007, India; Phone: (+) 91-40-27192568

<sup>c</sup>Department of Chemistry, Gitam School of Technology, Gitam University, Hyderabad (T.S), India-502 102

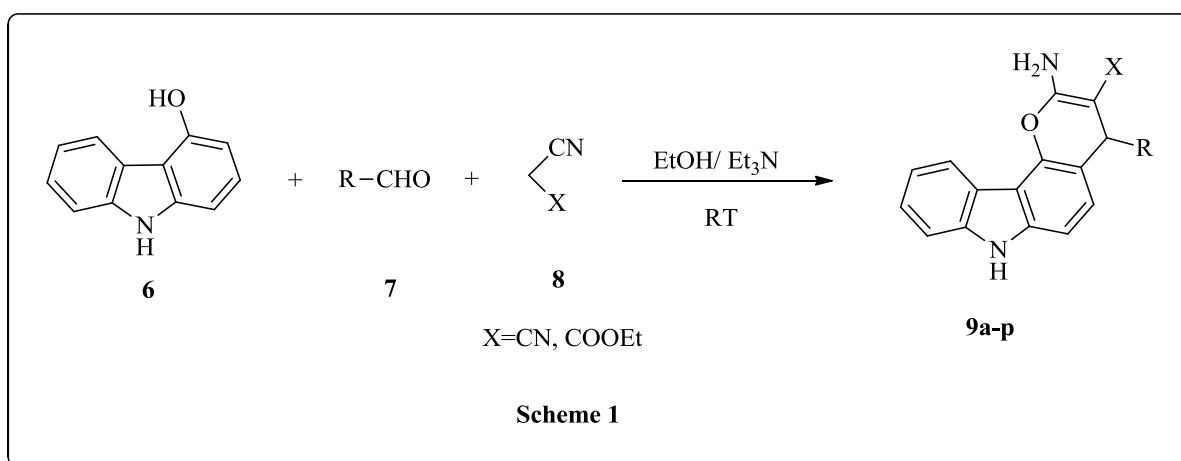

**Table of content**

1. Copies of <sup>1</sup>H and <sup>13</sup>C NMR spectra of products

S2-S19

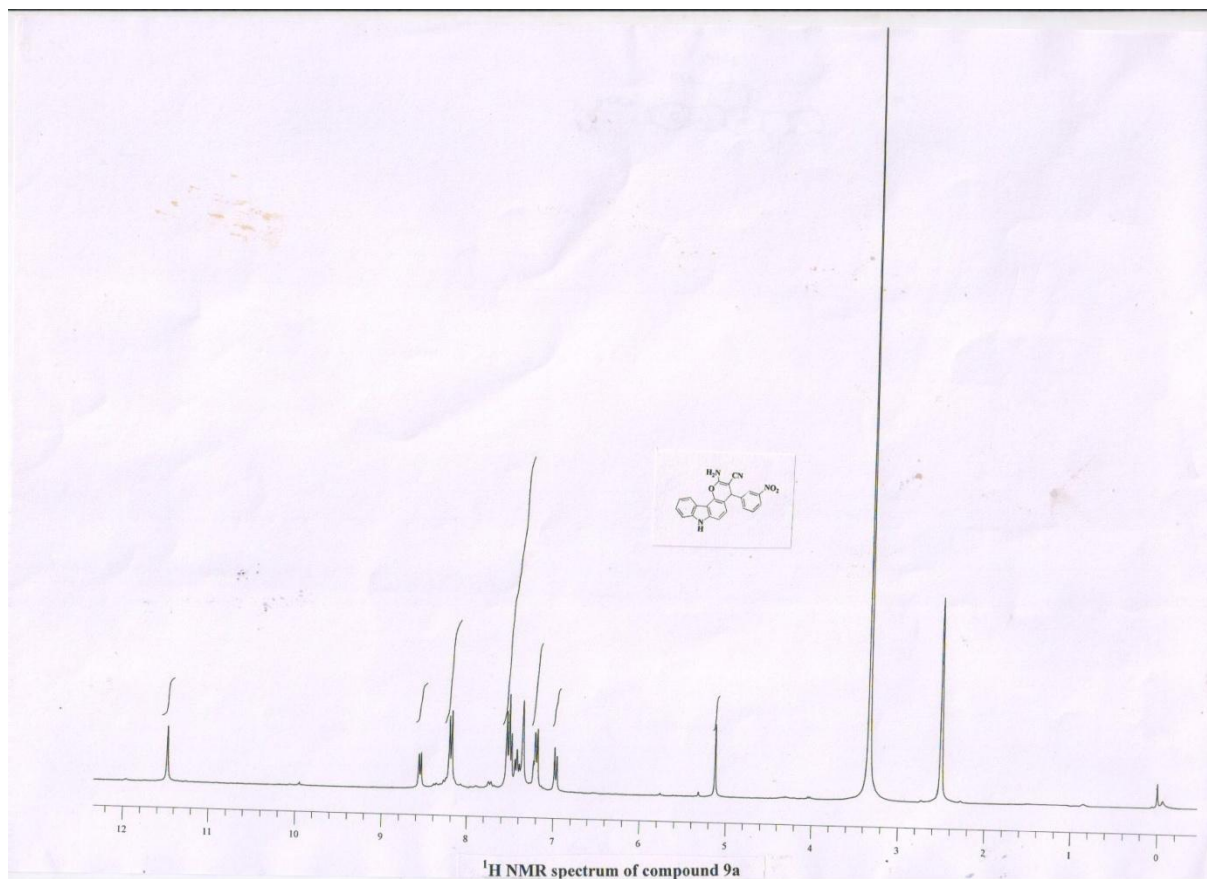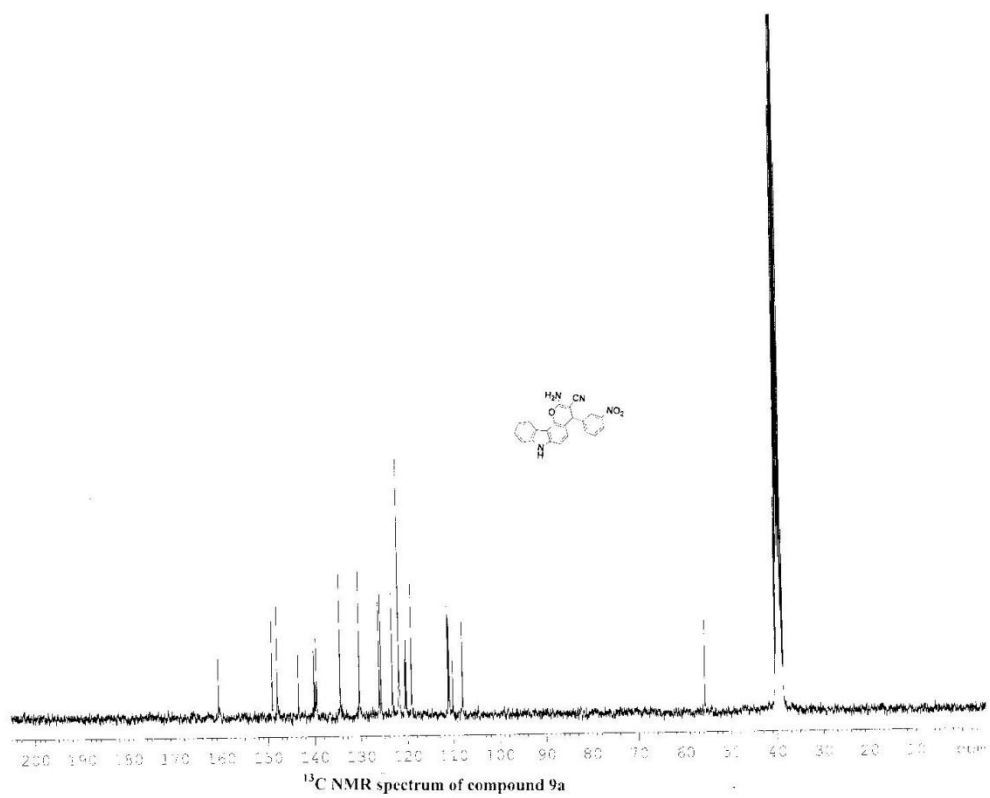

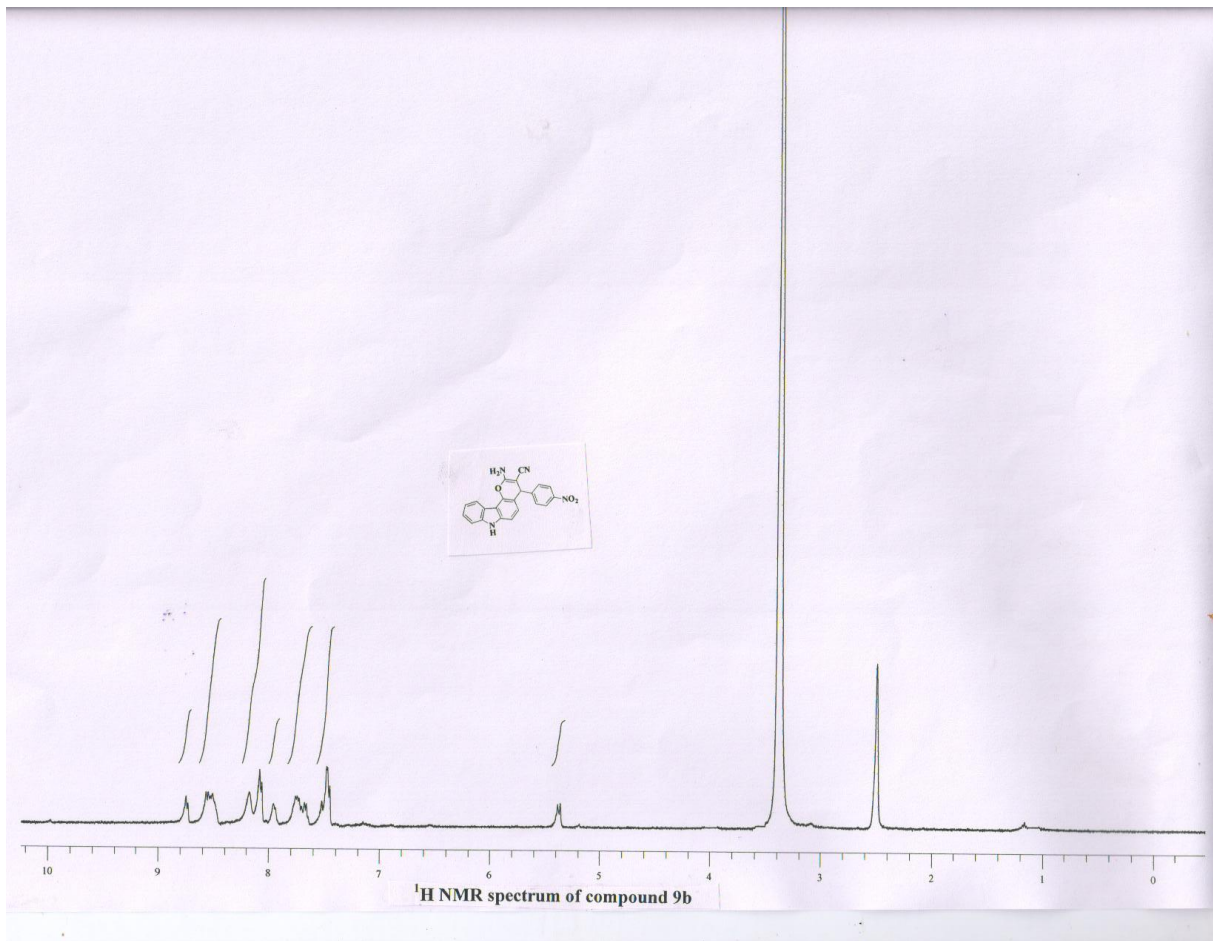

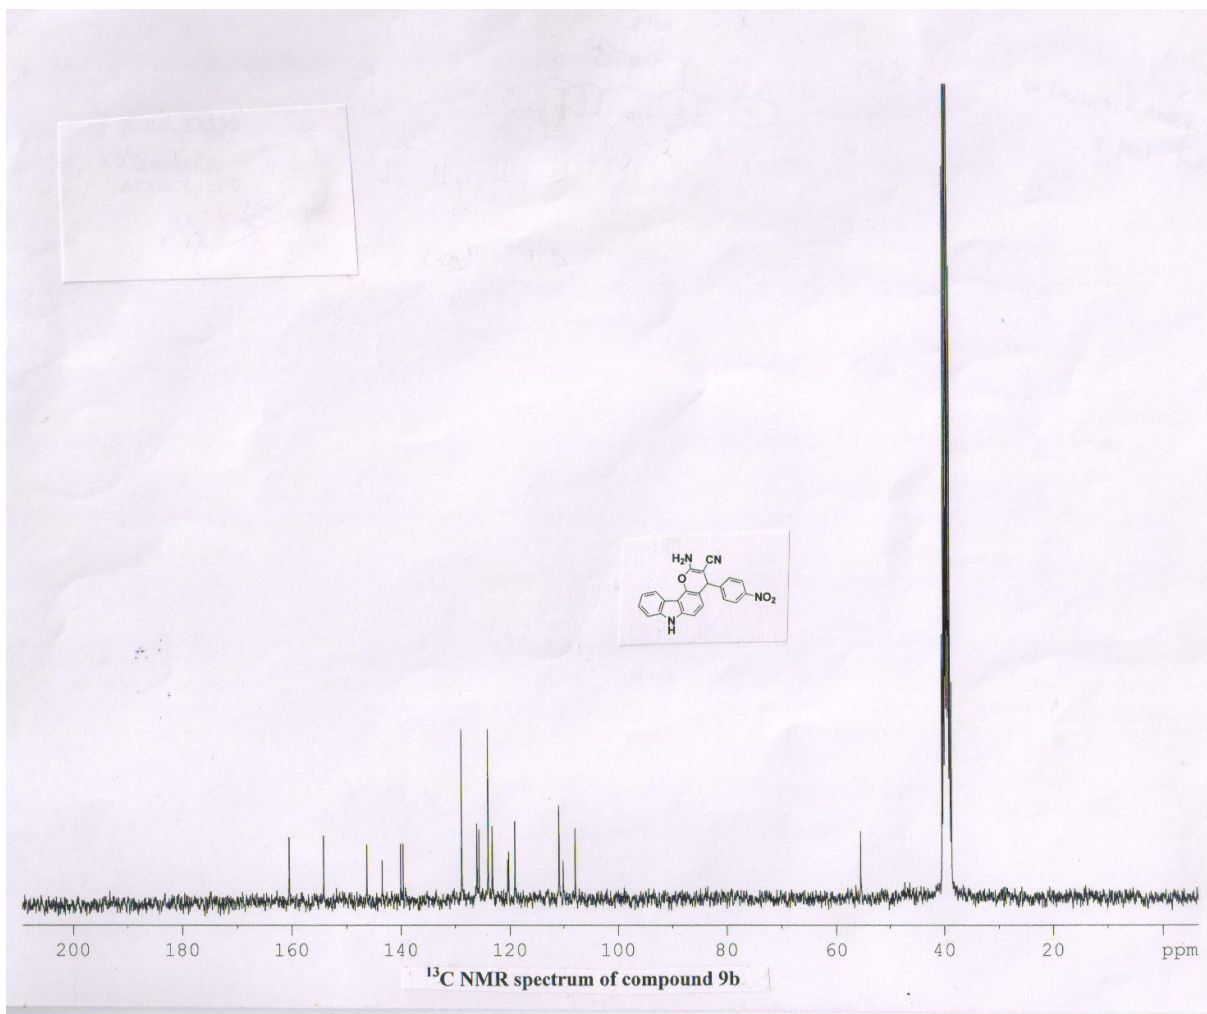

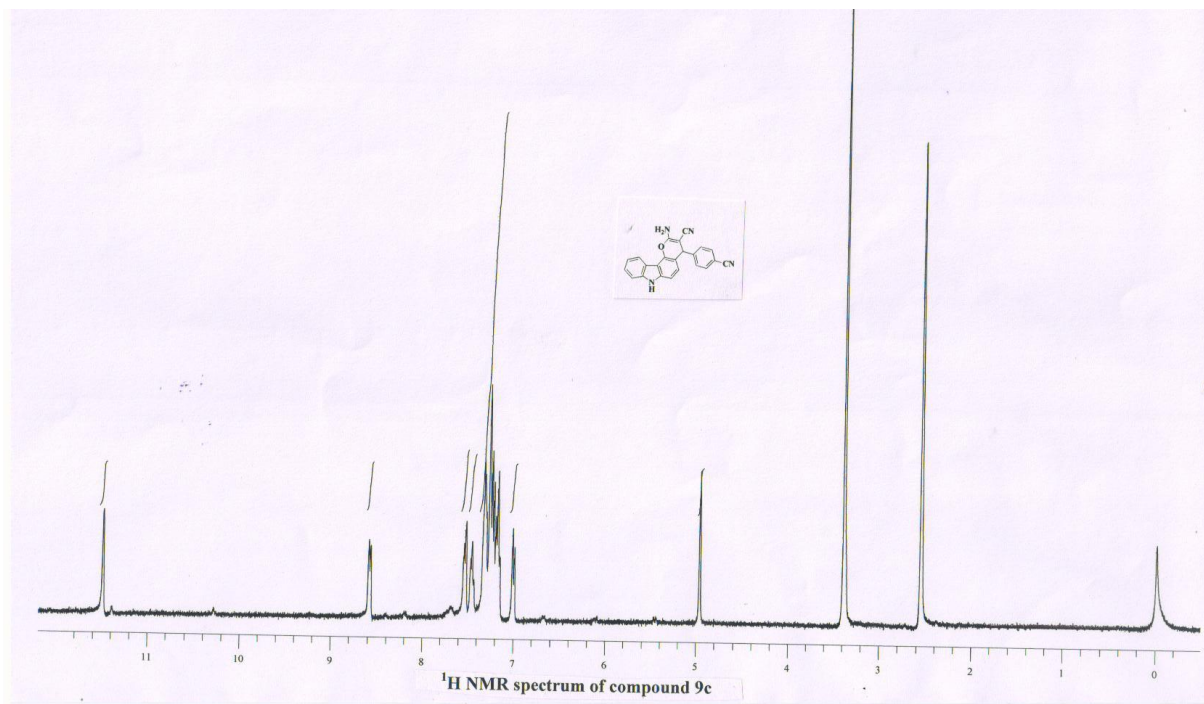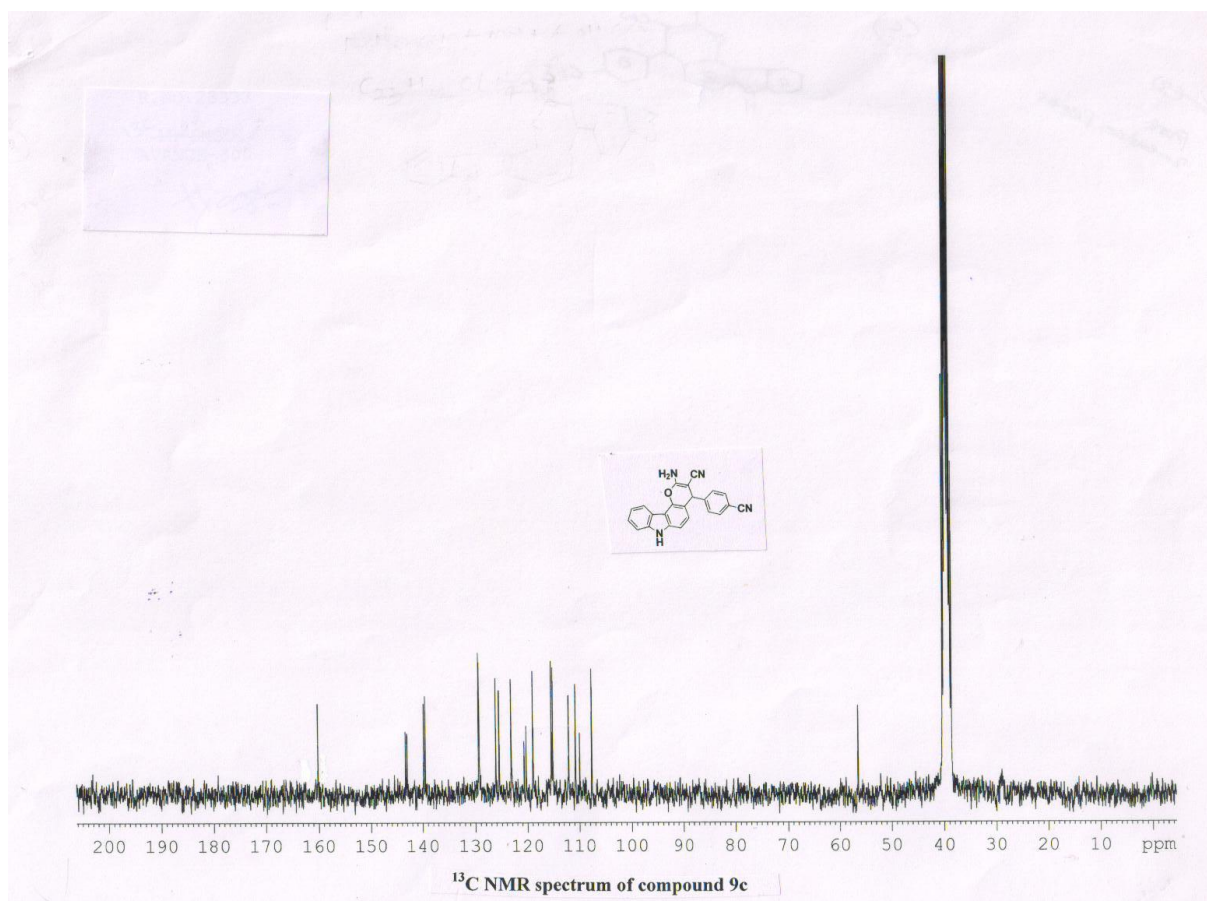

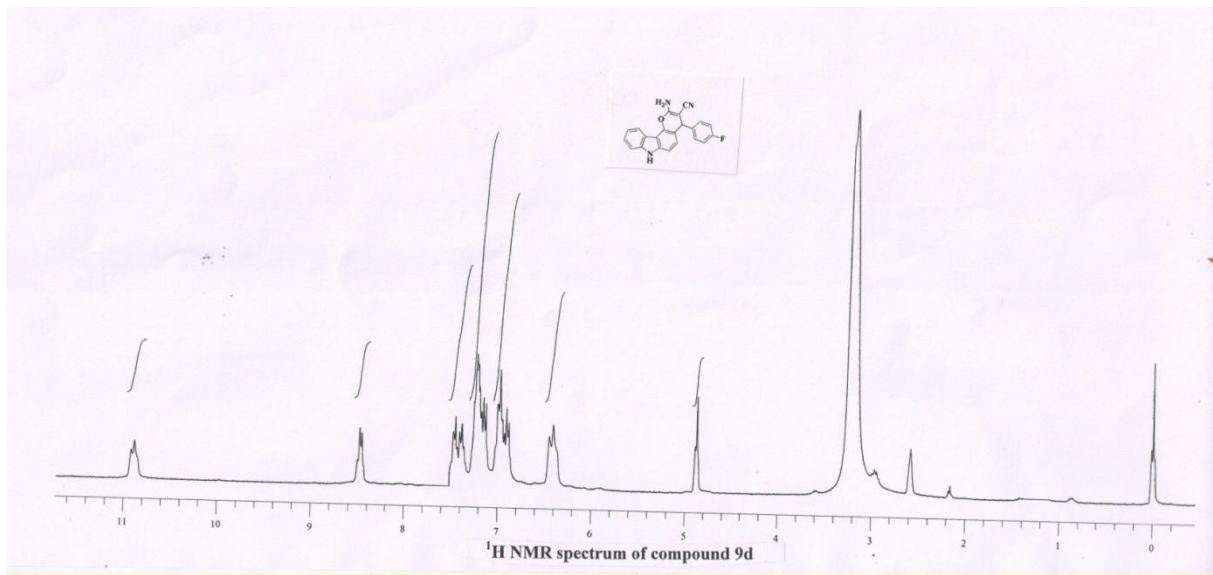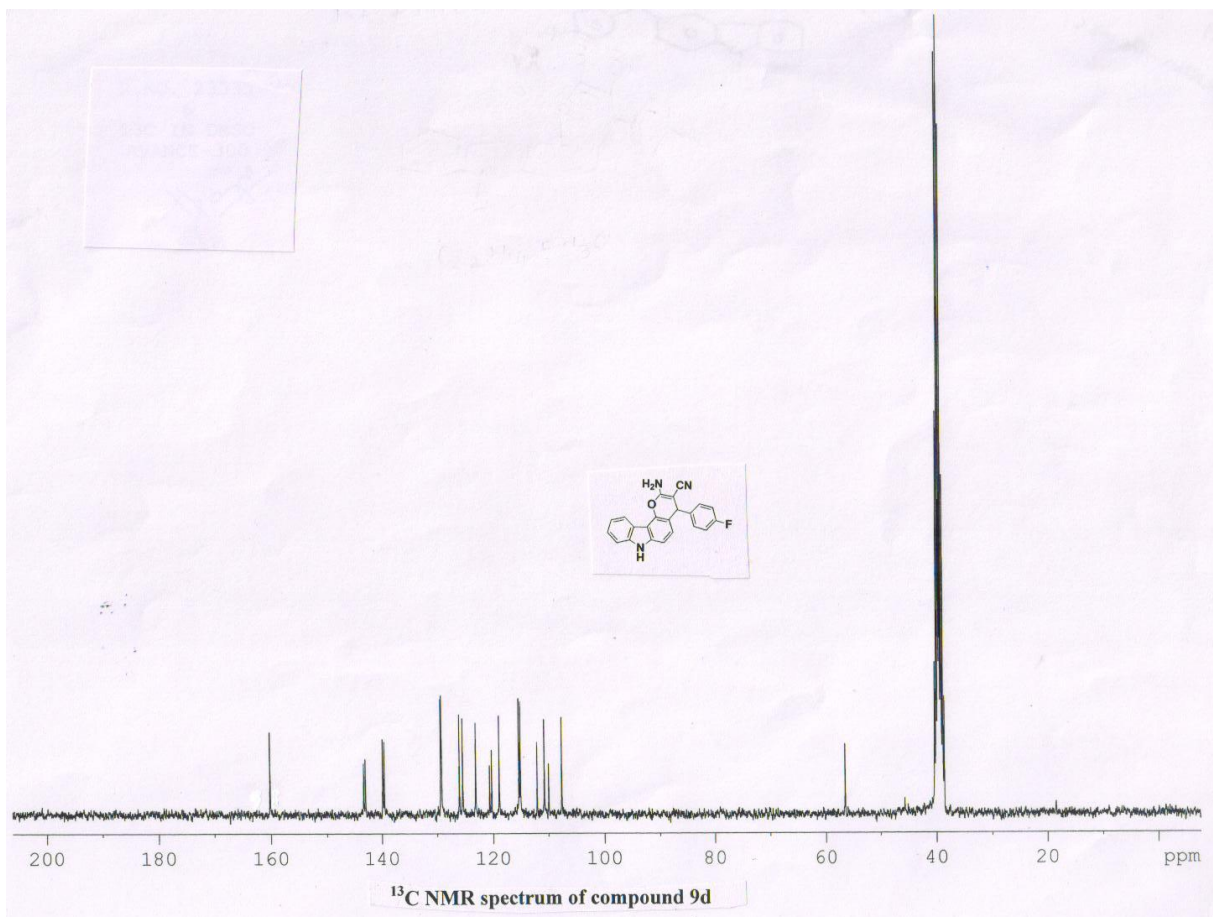

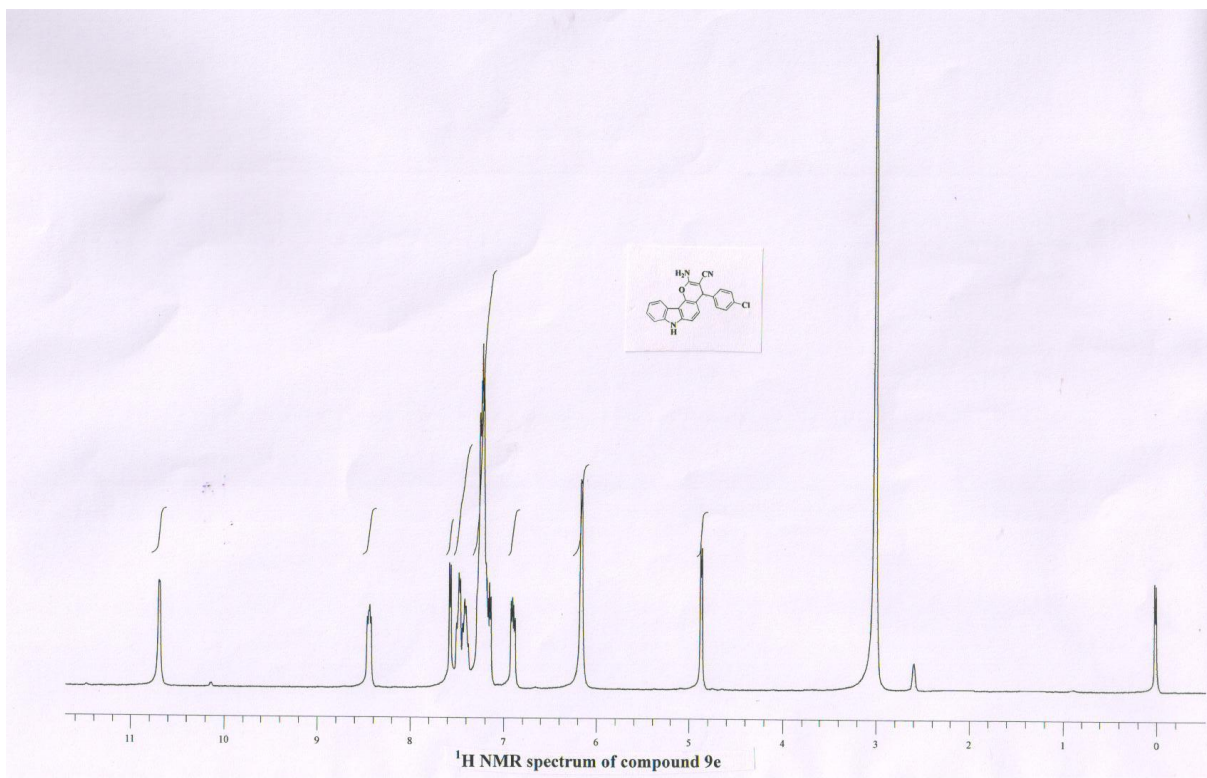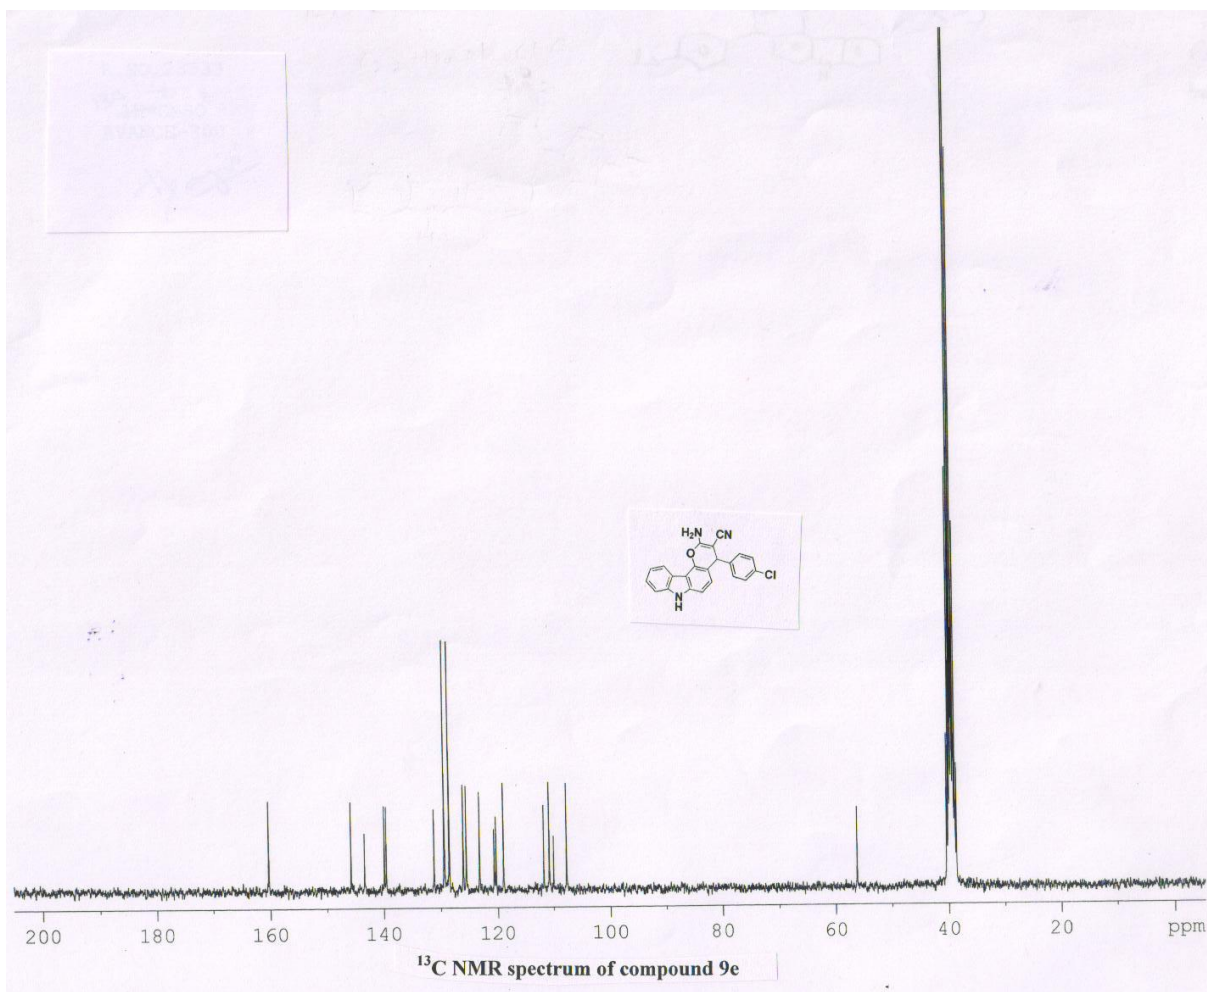

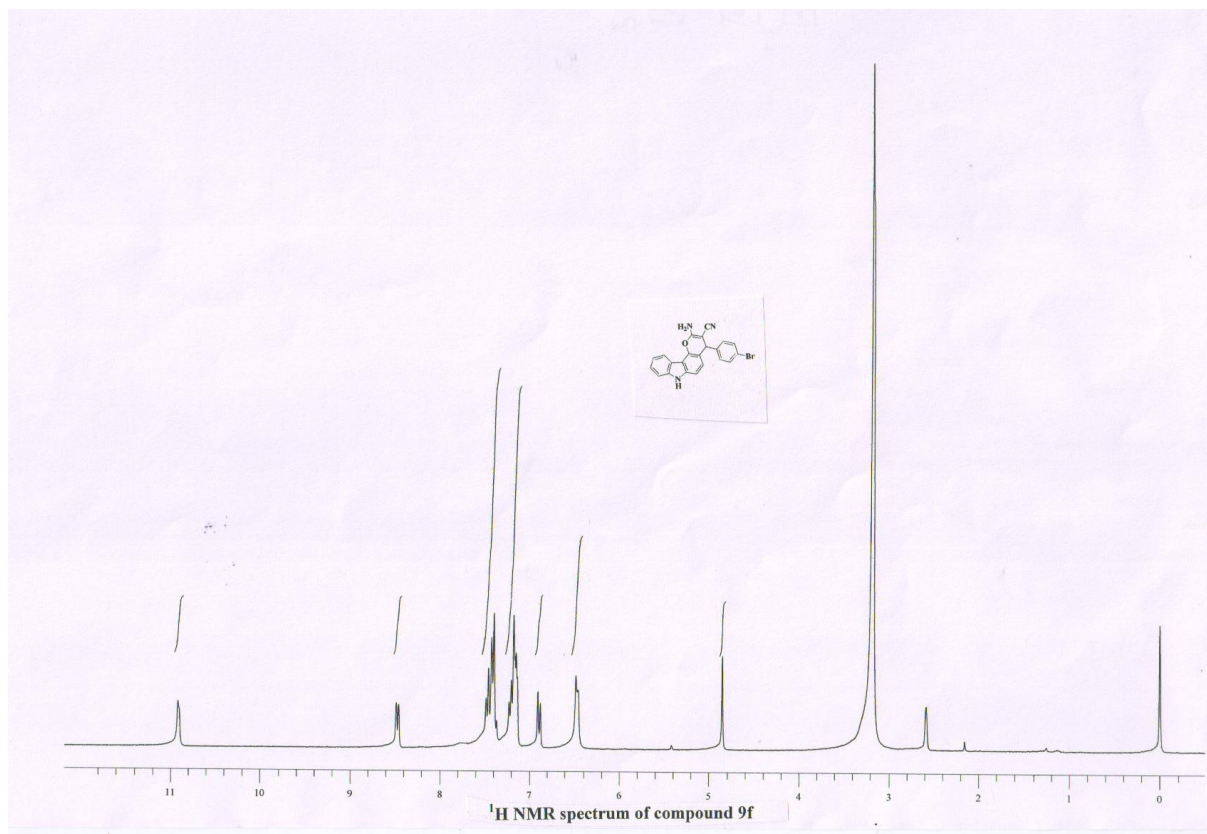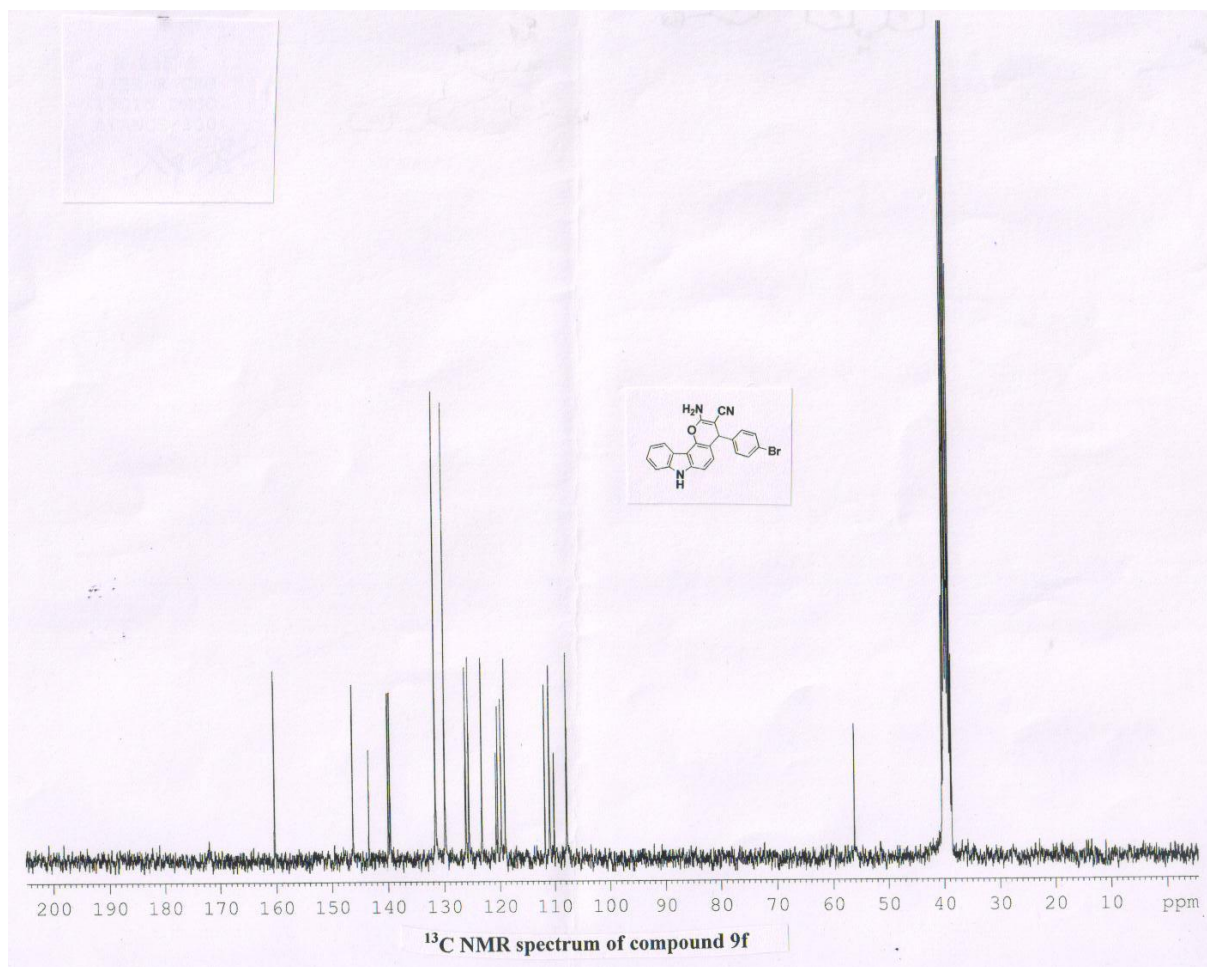



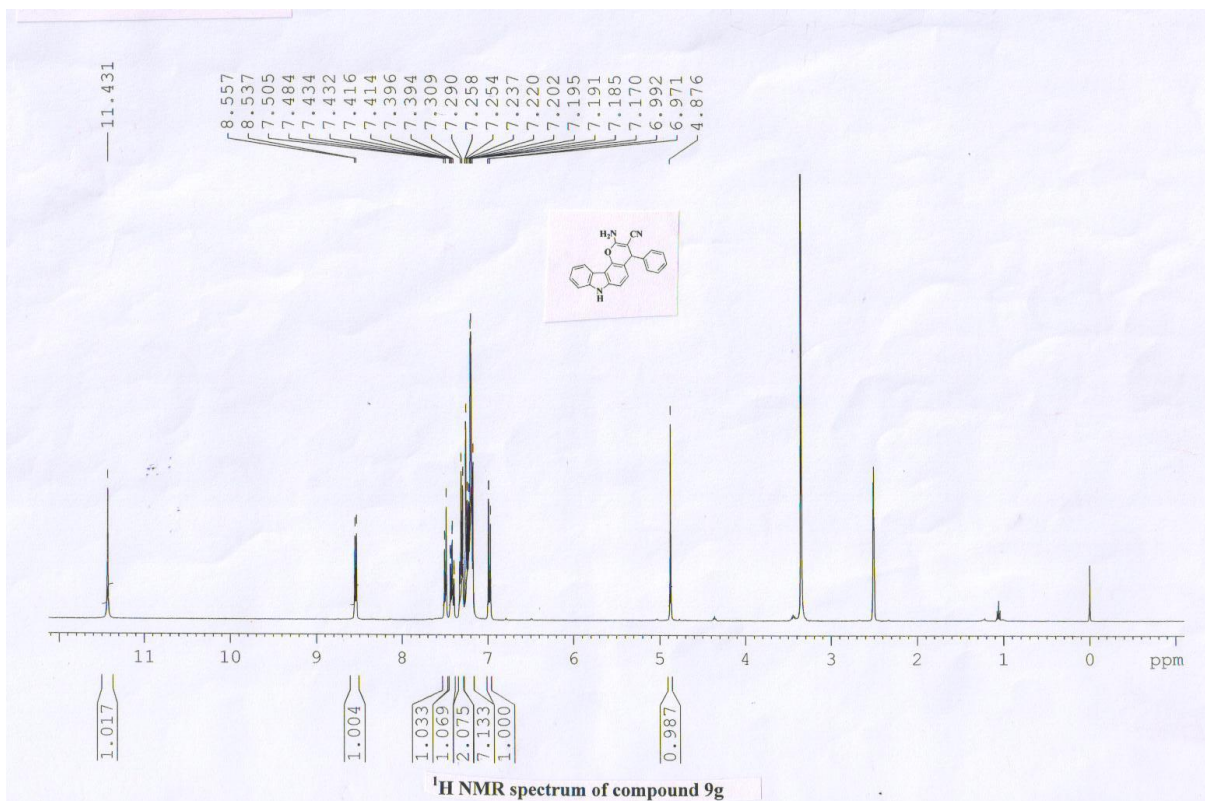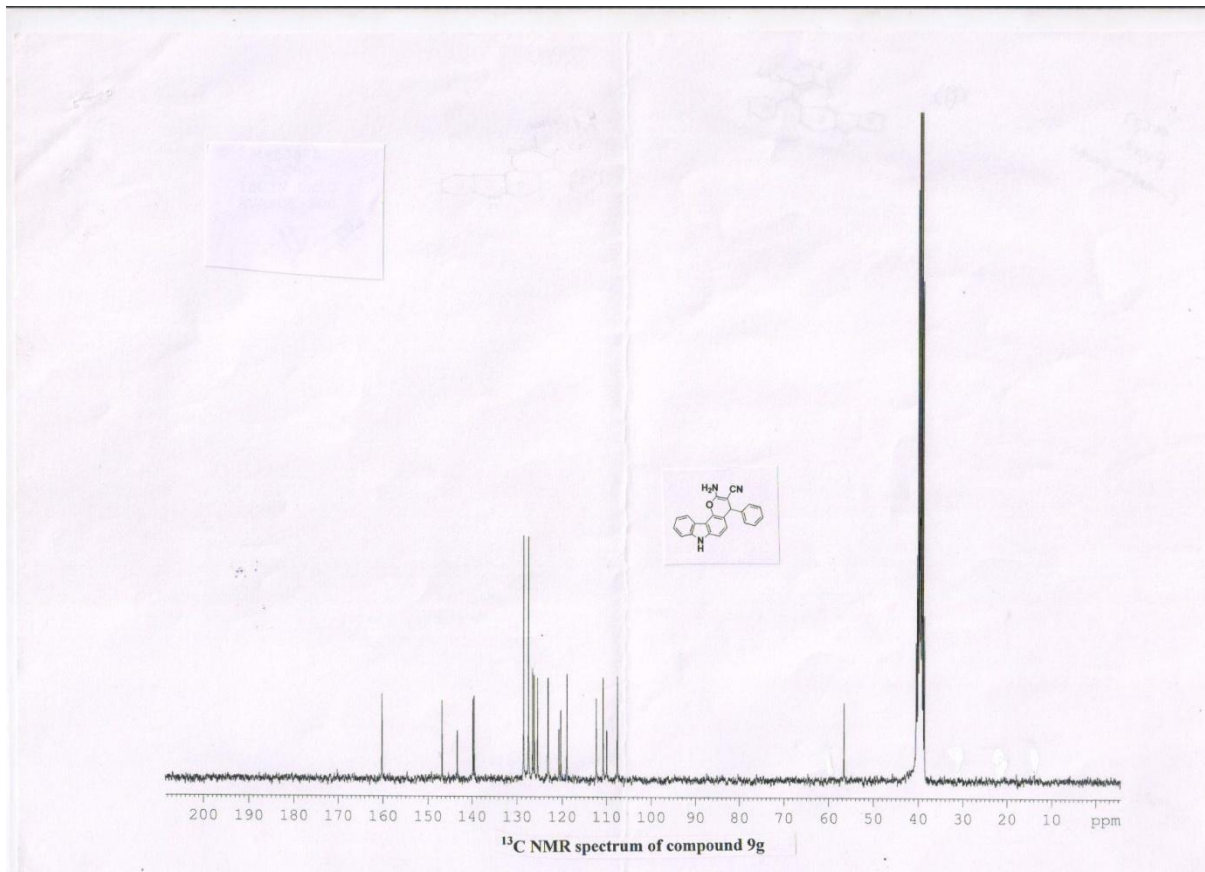

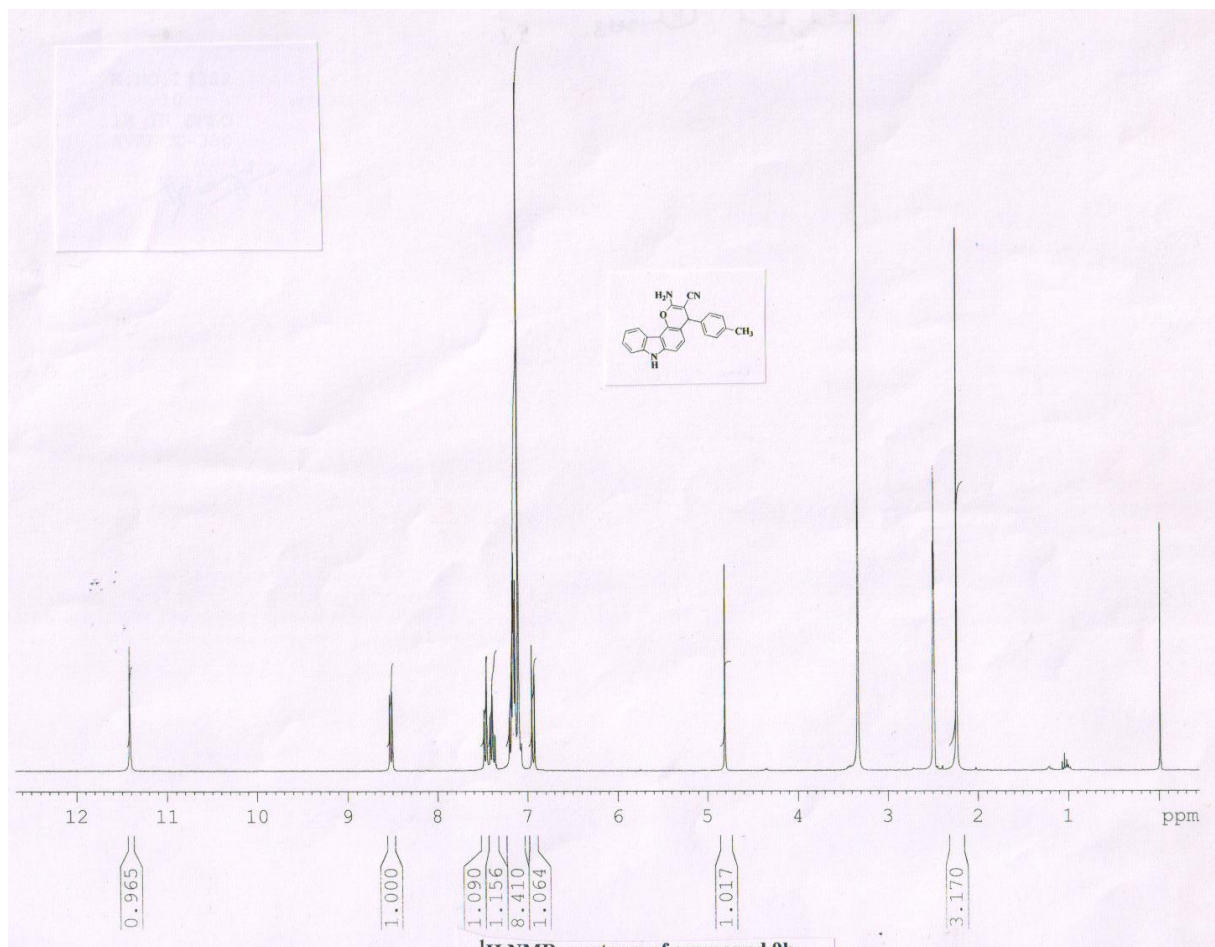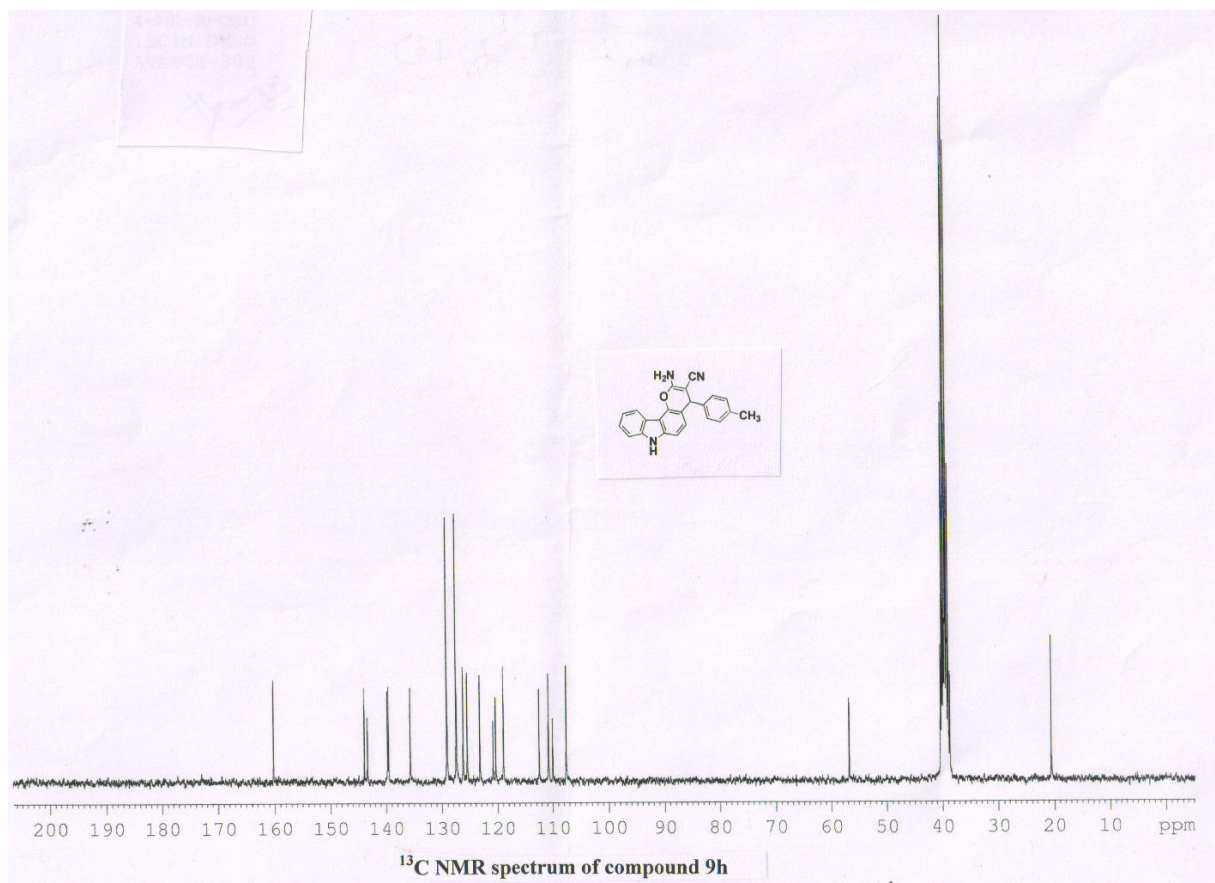

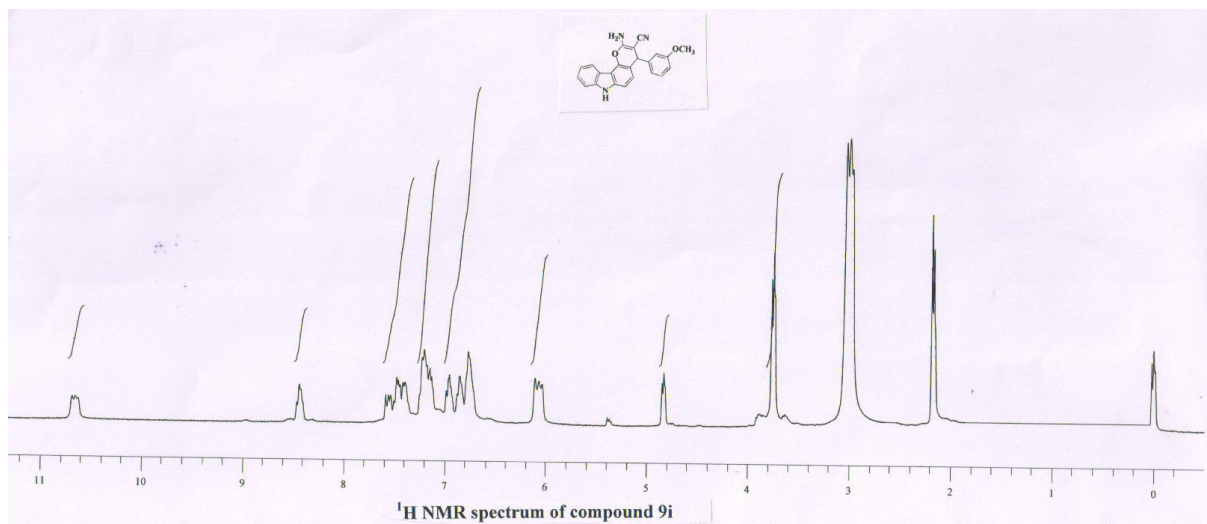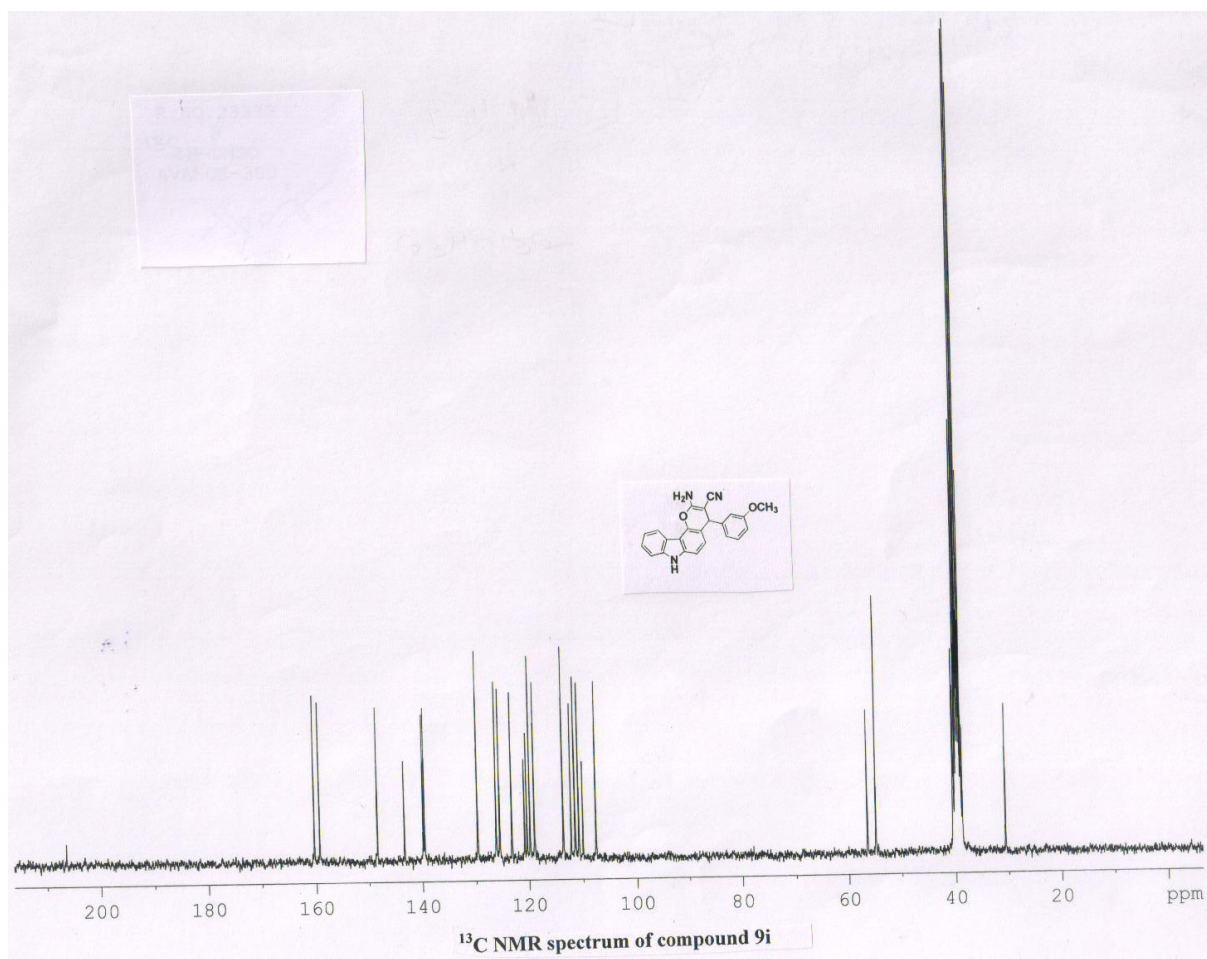

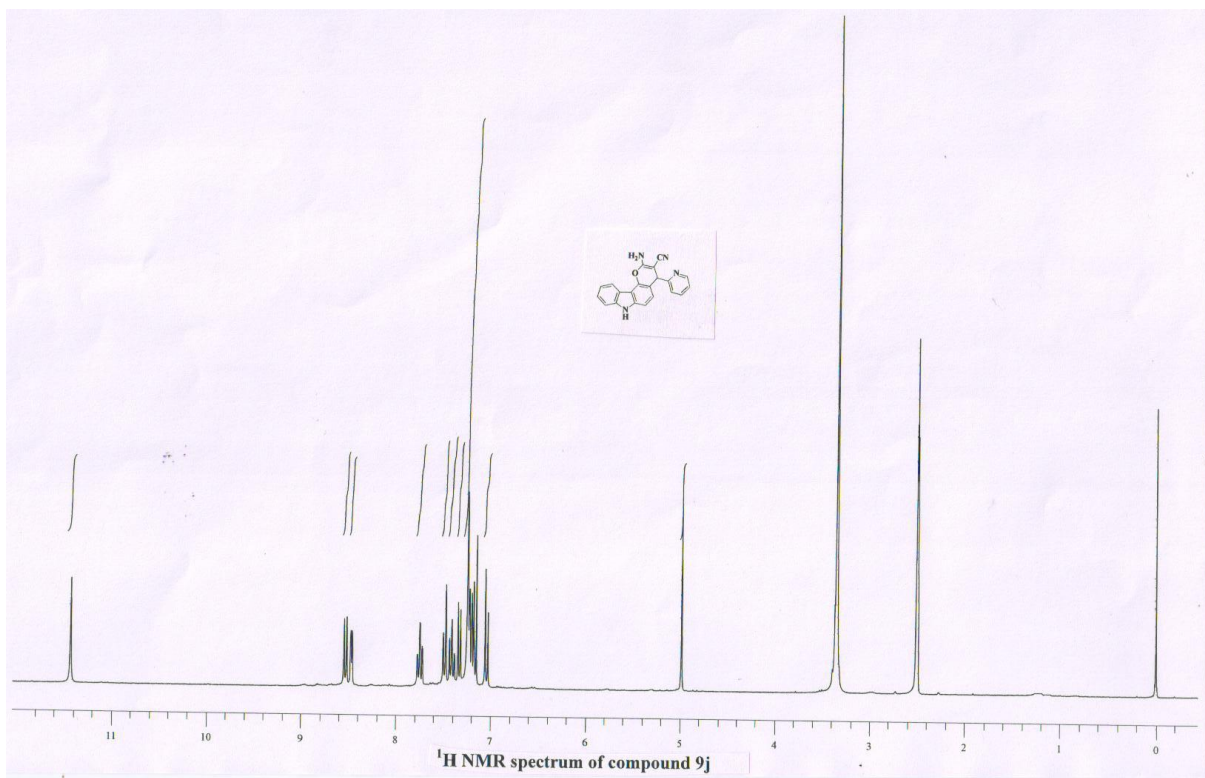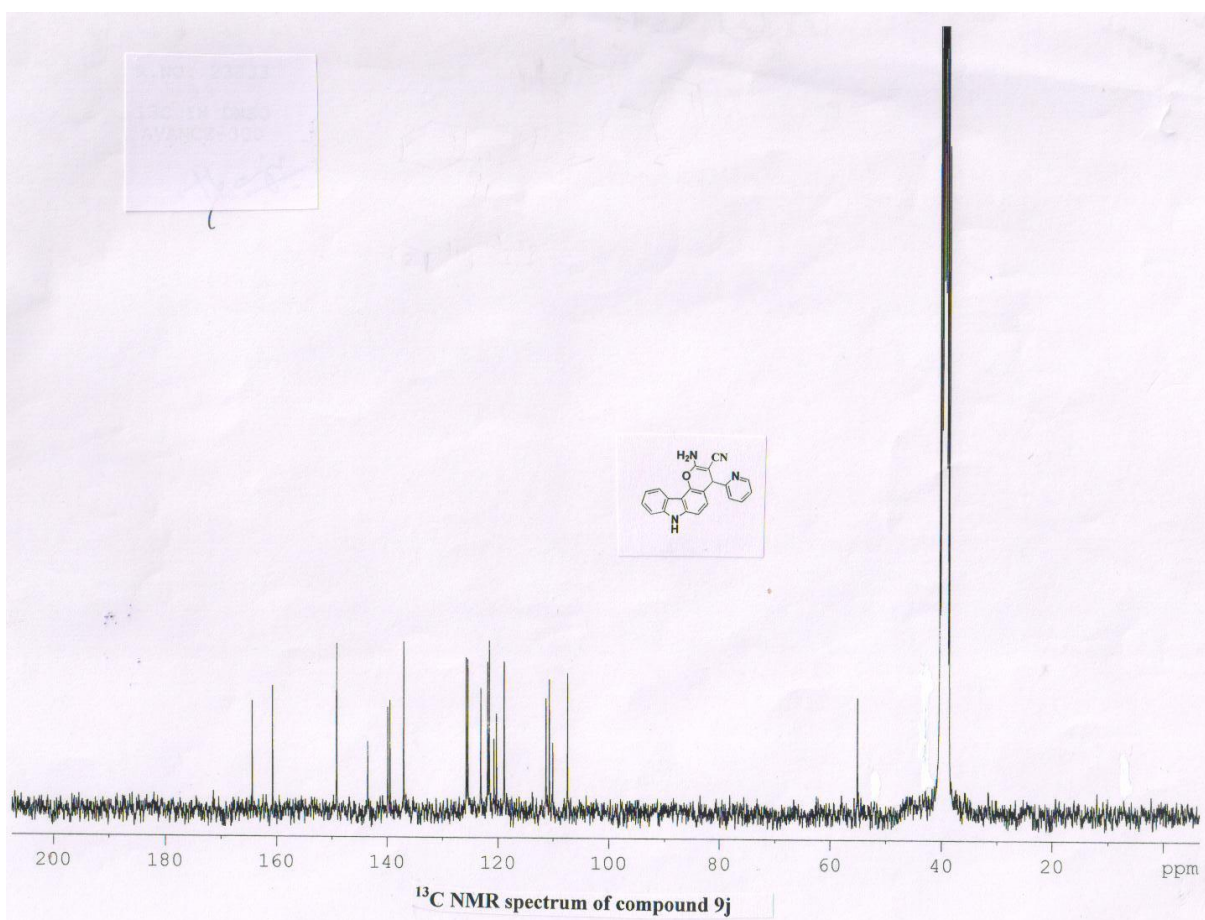

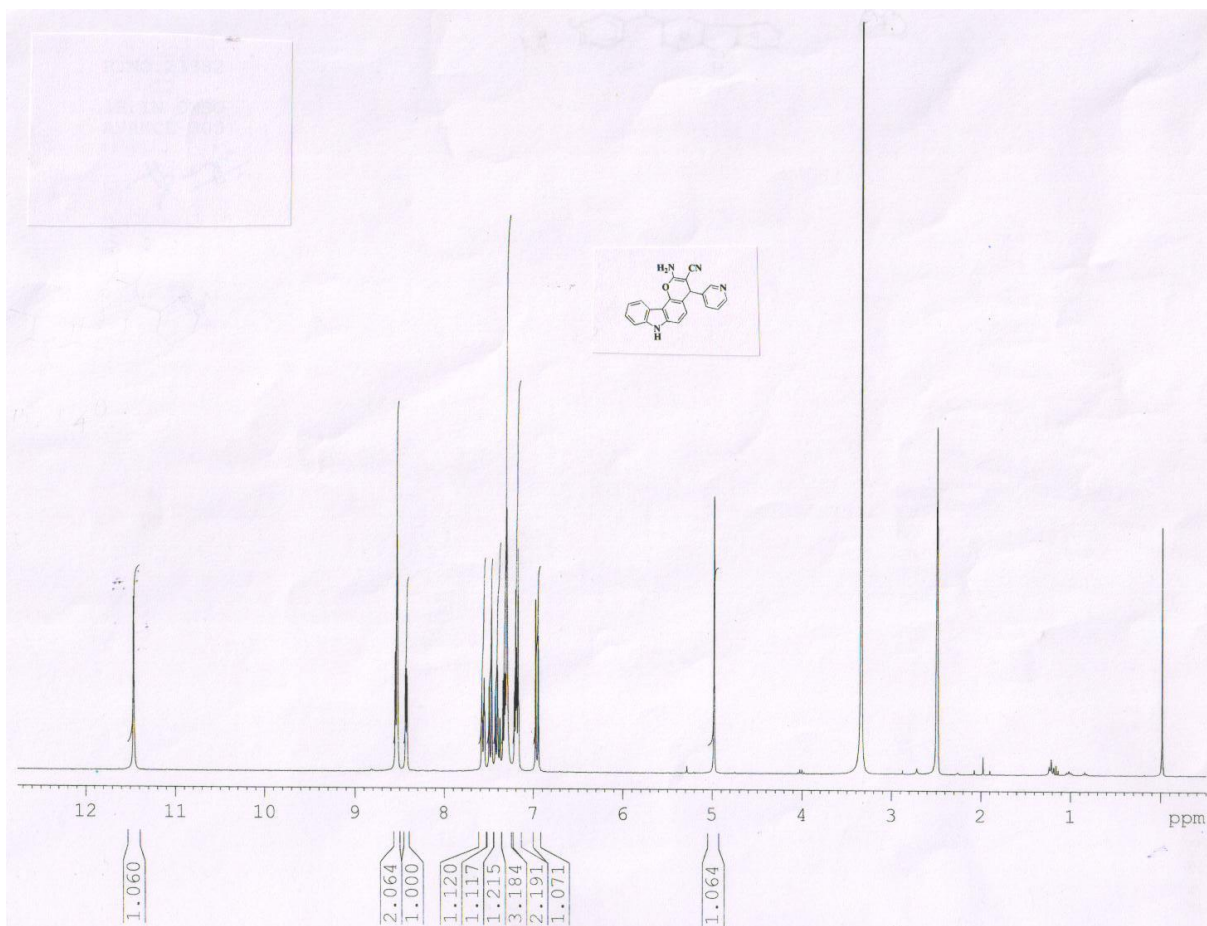

<sup>1</sup>H NMR spectrum of compound 9k

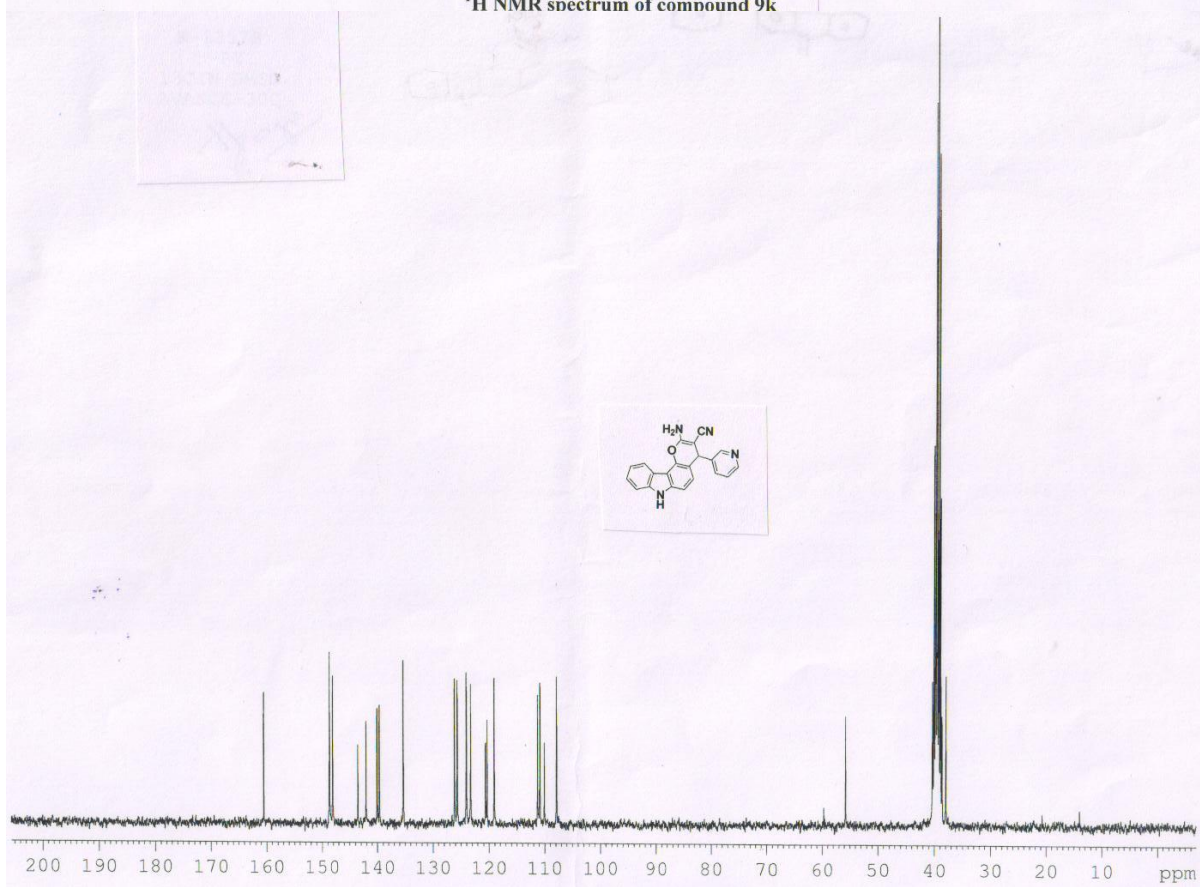

<sup>13</sup>C NMR spectrum of compound 9k

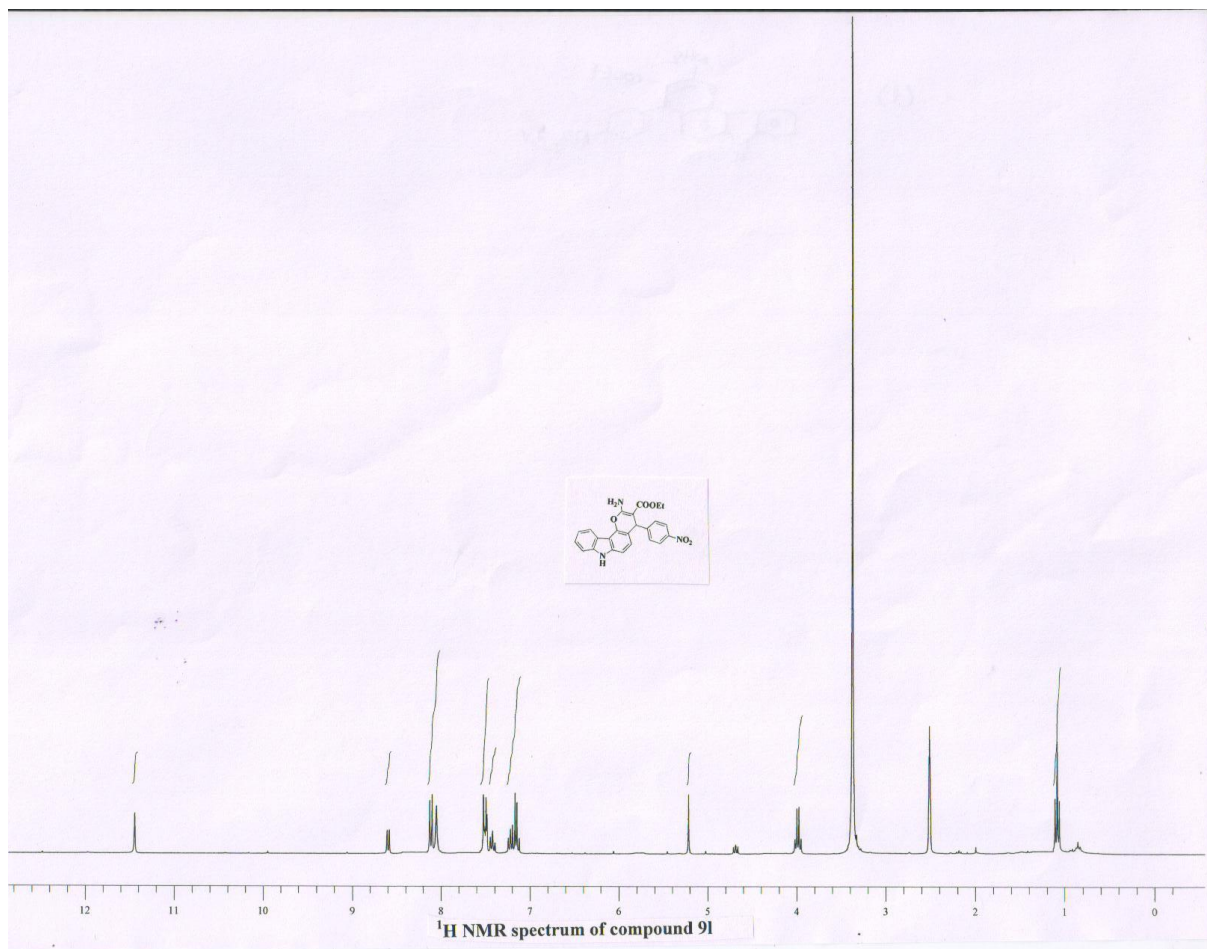

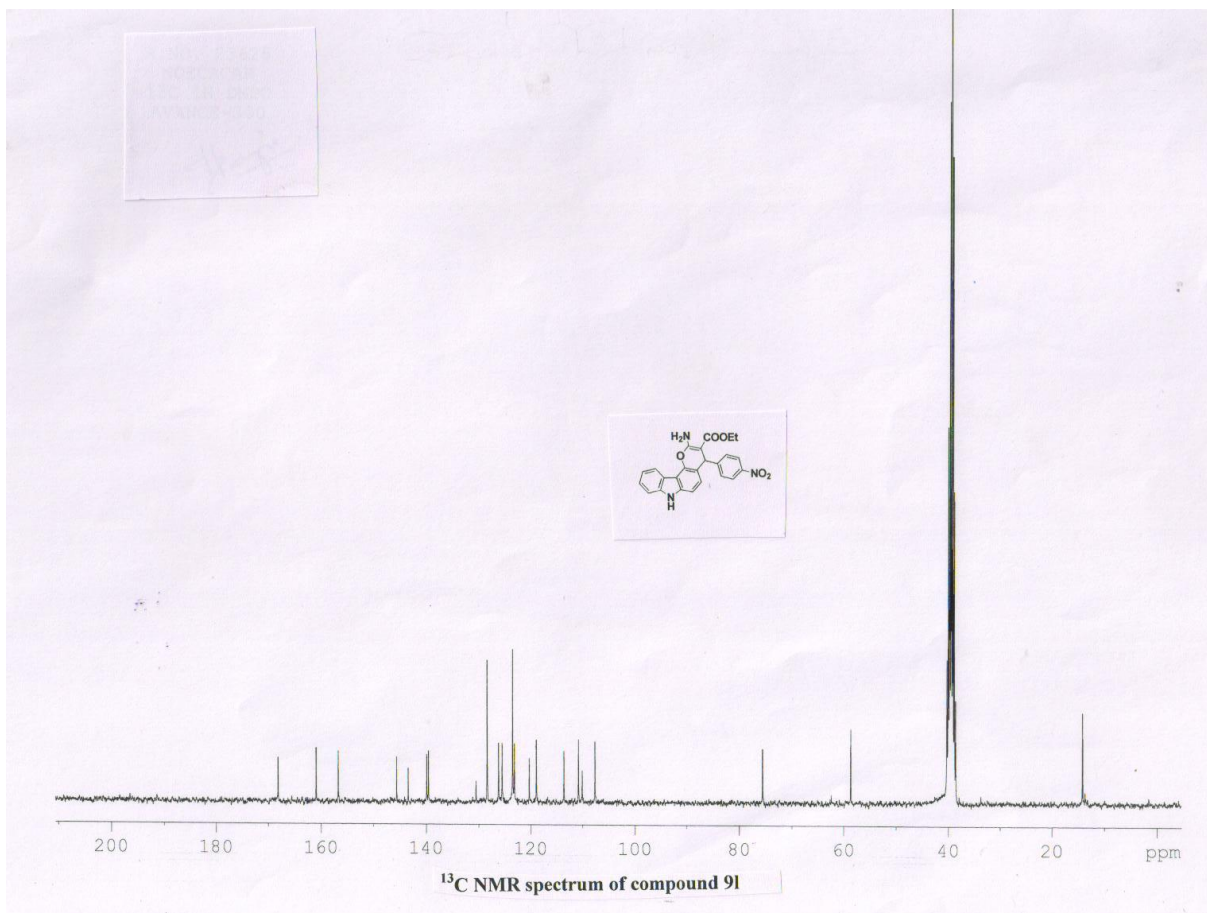

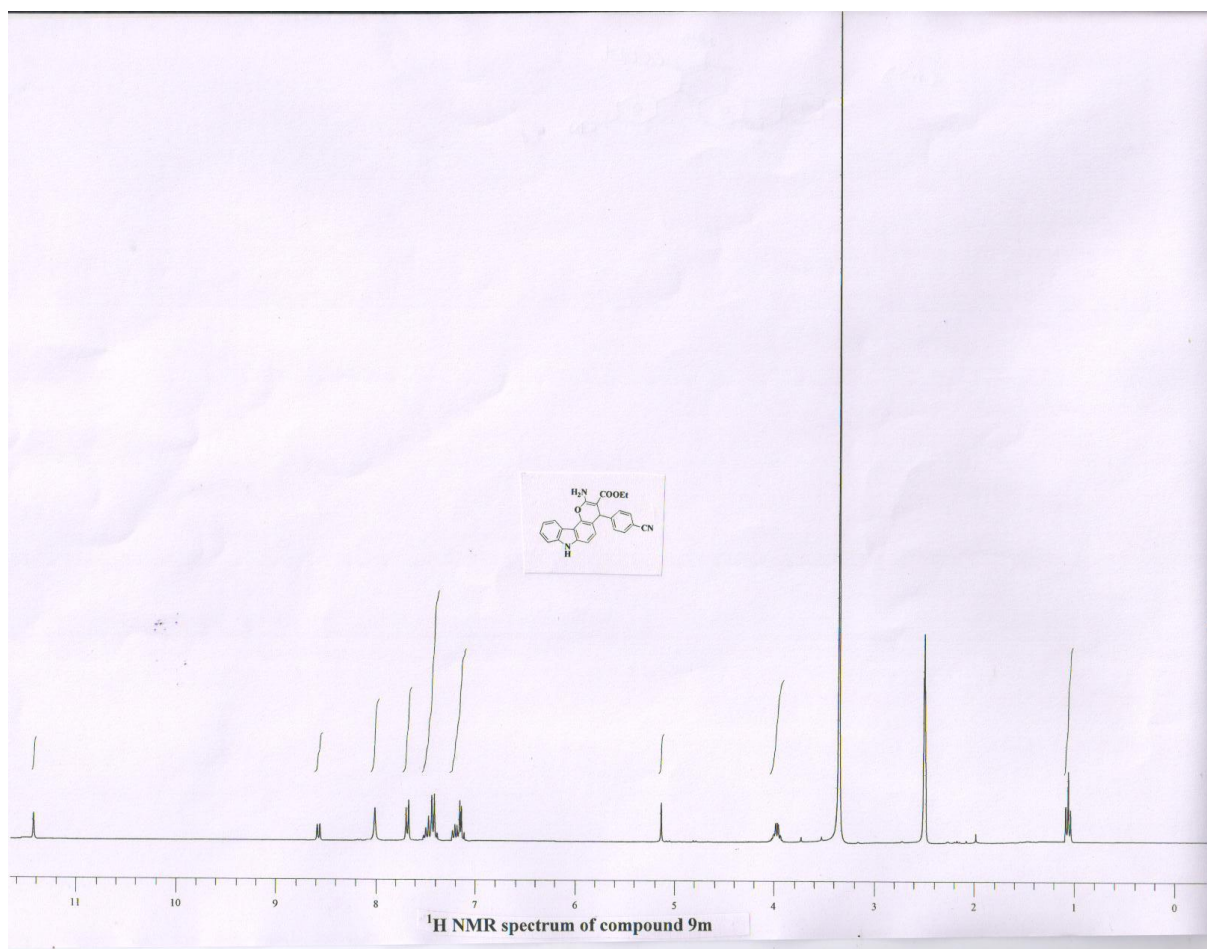



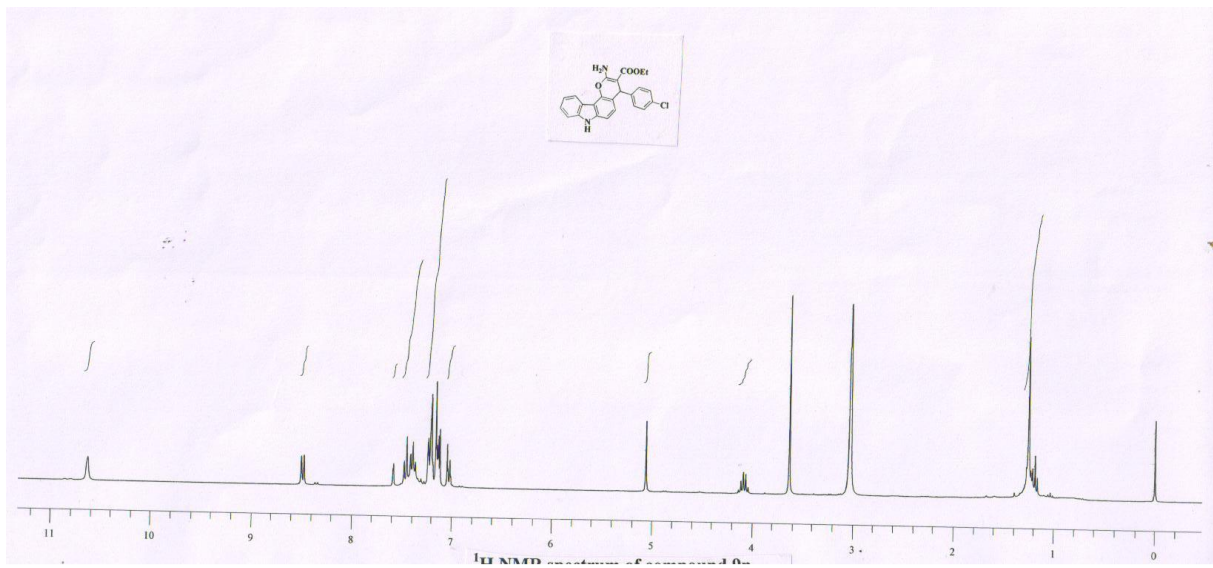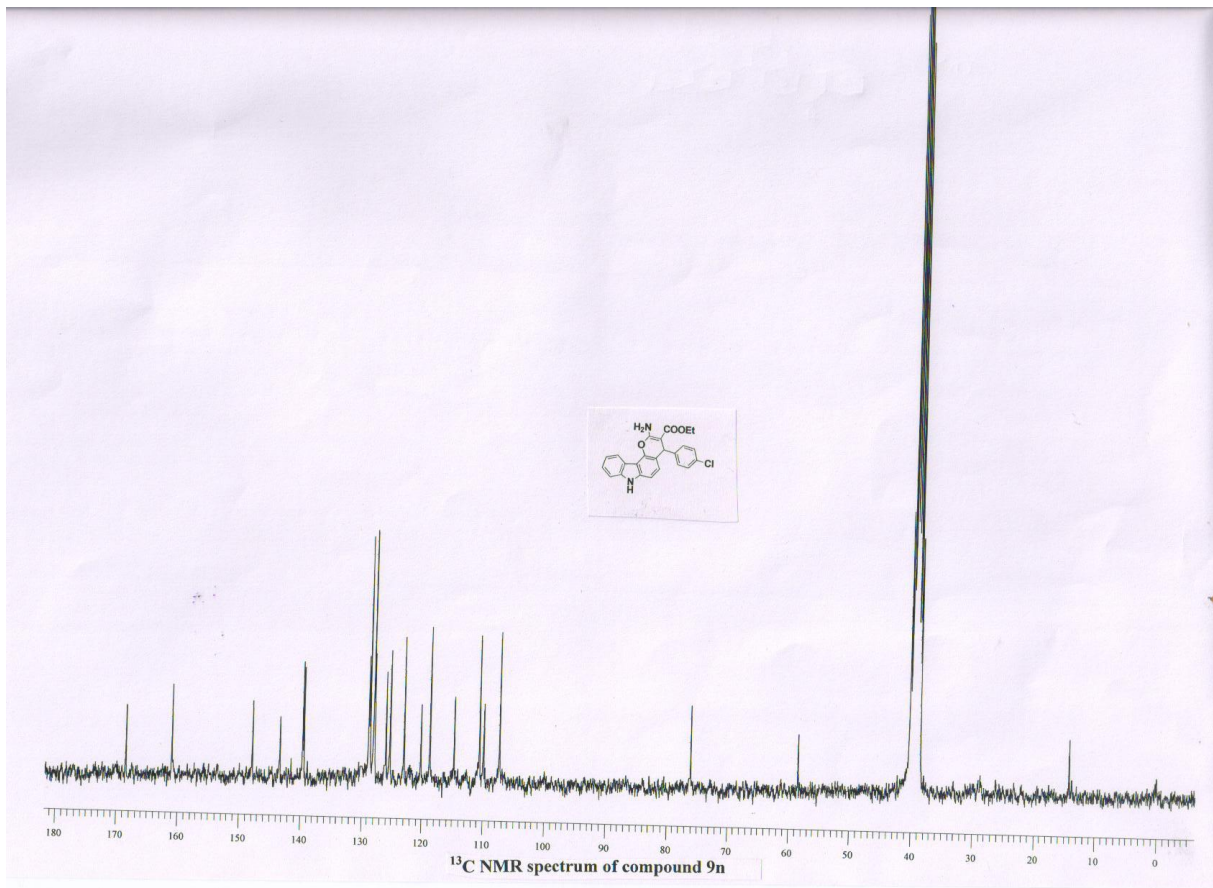

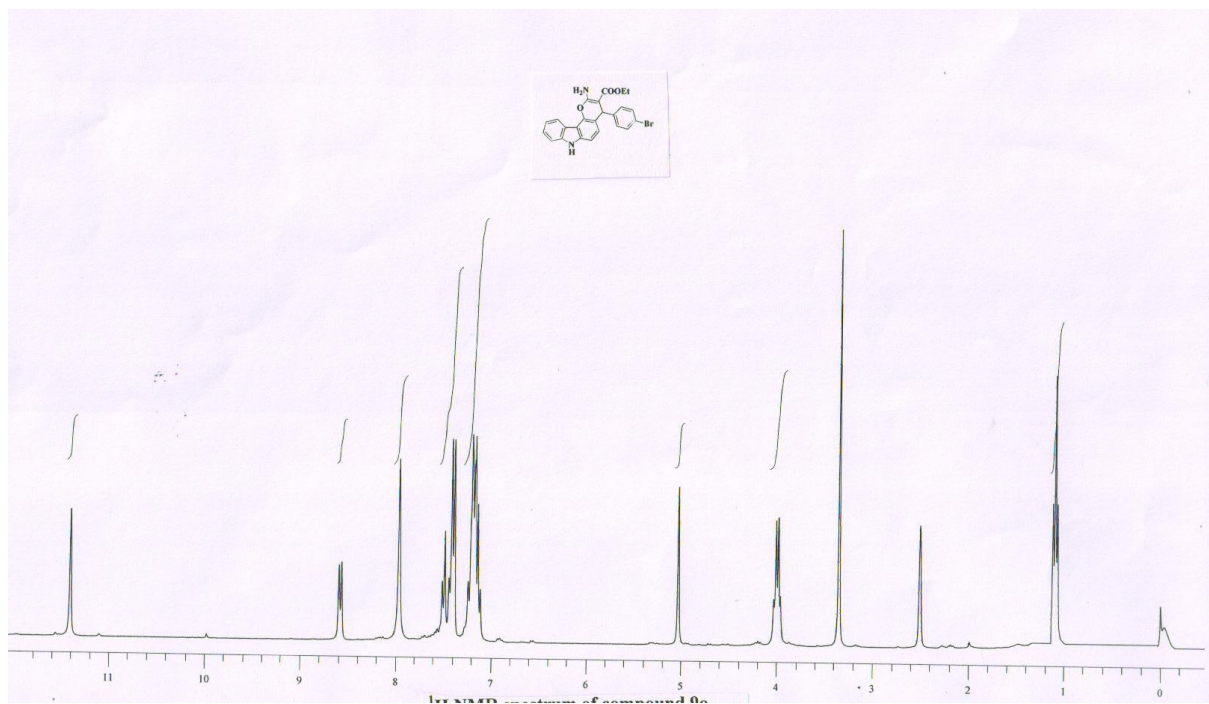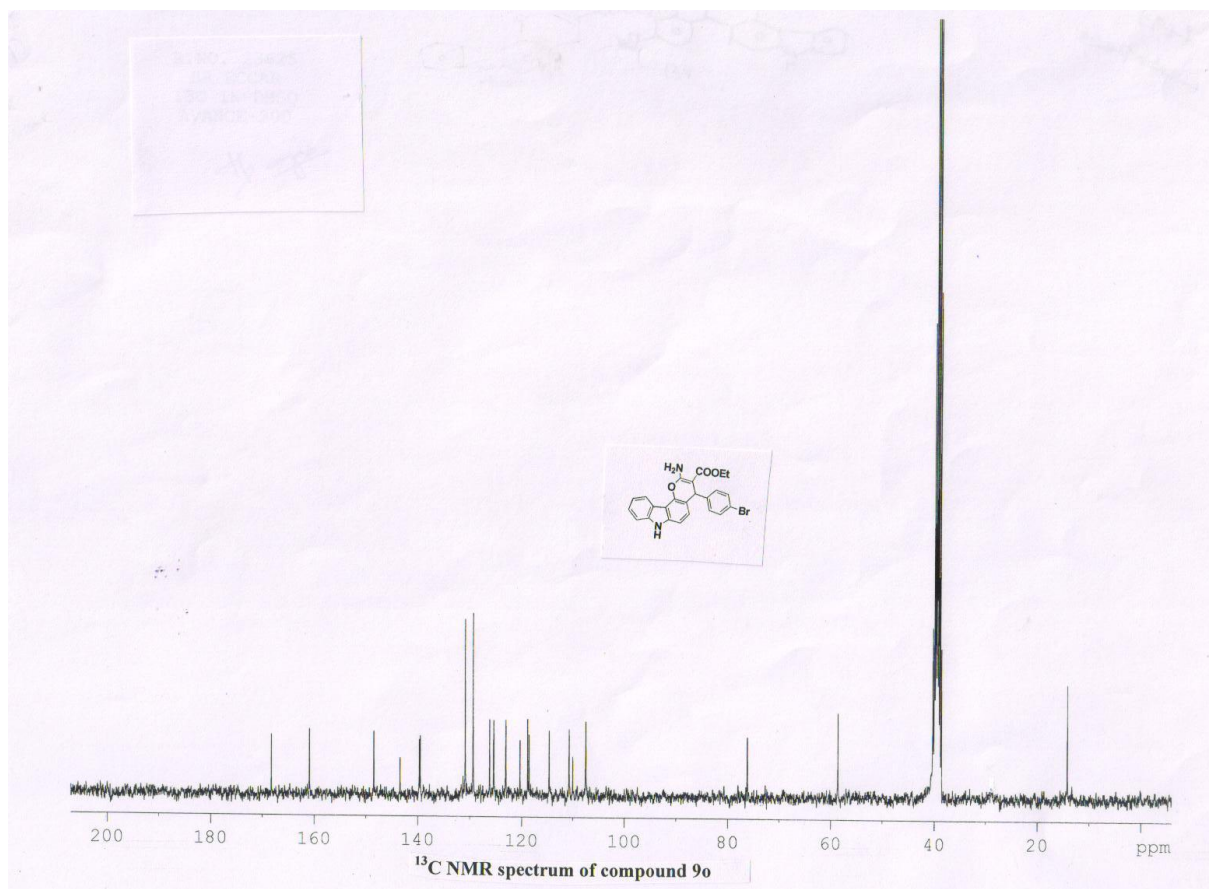

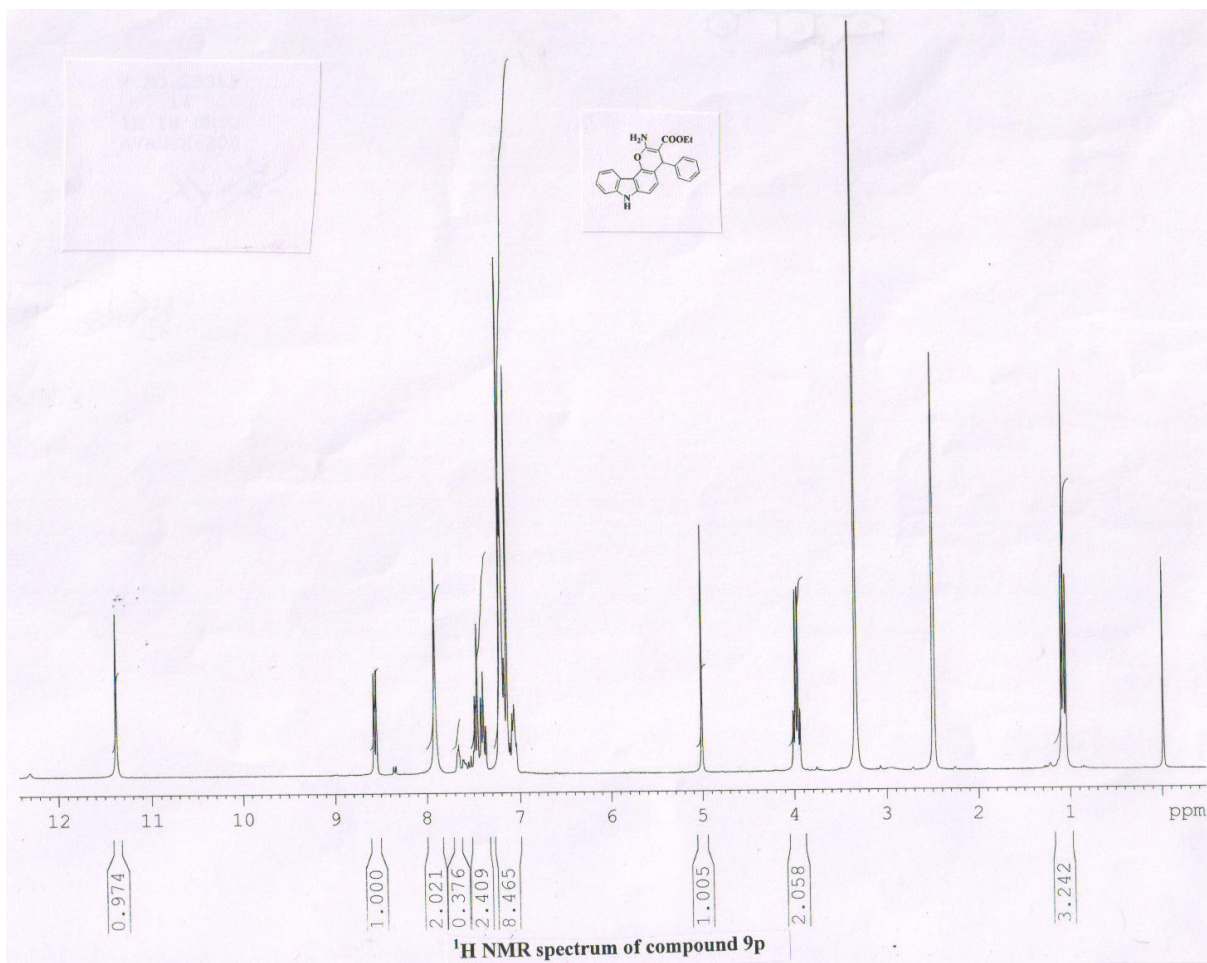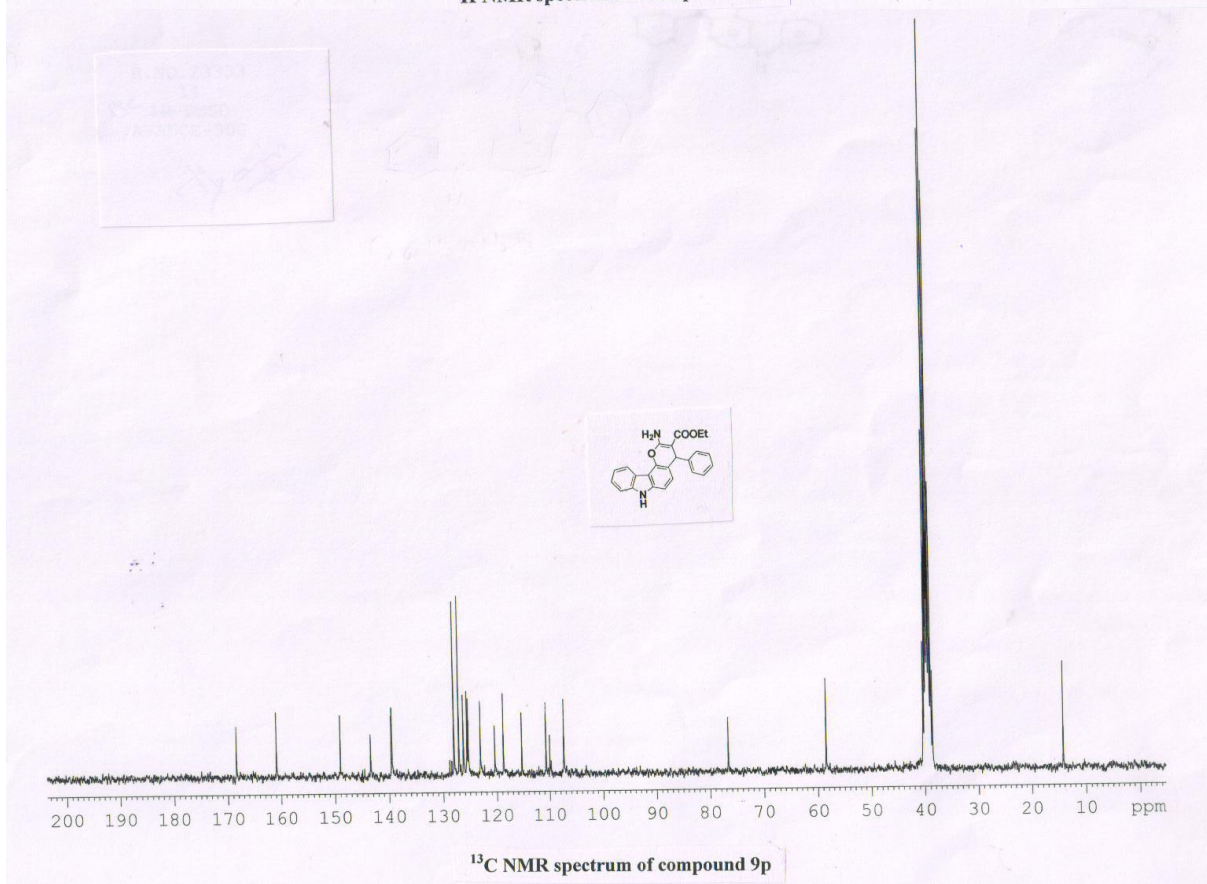

Supplement: c4ob02015d1.pdf [file c4ob02015d1.pdf]
